# Supplementary material
Source: Springer Nature journal article supplement (https://www.springermedizin.de/resource/supplementary/12893_2011_234_MOESM2_ESM.pdf/9511932)
Supplement: MOESM2 [file 9511932]

**Assessed for eligibility**

(Male patients, 18-60 years, simultaneous  
bilateral TEP hernia repair, March 2010-  
Augustst 2011)

n= 76

**Excluded due to**

- Vasectomy
- History of urologic surgery and/or  
radiotherapy
- Reoperation

n= 41

**Fulfilled study criteria**

n= 35

**Patients not wishing to participate**

n= 14

**Patients included in the study**

n= 21

**Loss to follow-up**

n= 2
